# Supplementary material for: Investigations of the Effect of H2 in CO Oxidation over Ceria Catalysts
Source: MDPI journal article supplement (doi:10.3390/catal11121556), 2021-12-20
Supplement: s1 [file s1]

Article

# Investigations of the effect of H<sub>2</sub> in CO oxidation over ceria catalysts

Arantxa Davó-Quiñonero<sup>\*1,2</sup>, Sergio López-Rodríguez<sup>2</sup>, Cristian Chaparro-Garnica<sup>2</sup>, Iris Martín-García<sup>3</sup>, Esther Bailón-García<sup>2</sup>, Dolores Lozano-Castelló<sup>2</sup>, Agustín Bueno-López<sup>2</sup> and Max García-Melchor<sup>\*1</sup>.

<sup>1</sup> School of Chemistry, CRANN and AMBER Research Centres, Trinity College Dublin, College Green, Dublin 2, Dublin, Ireland

<sup>2</sup> Inorganic Chemistry Department, University of Alicante, Carretera San Vicente del Raspeig s/n E-03080, Alicante, Spain.

<sup>2</sup> Organic Chemistry Department, University of Alicante, Carretera San Vicente del Raspeig s/n E-03080, Alicante, Spain.

\* Correspondence: arantxa.davo@tcd.ie; Tel.: +353 83 393 0023 (A.D.Q.); garciam@tcd.ie; Tel.: +353 1896 8485 (M.G.M.)

Received: 9 December 2021; Accepted: 11 December 2021; Published: 20 December 2021

**X-ray diffraction**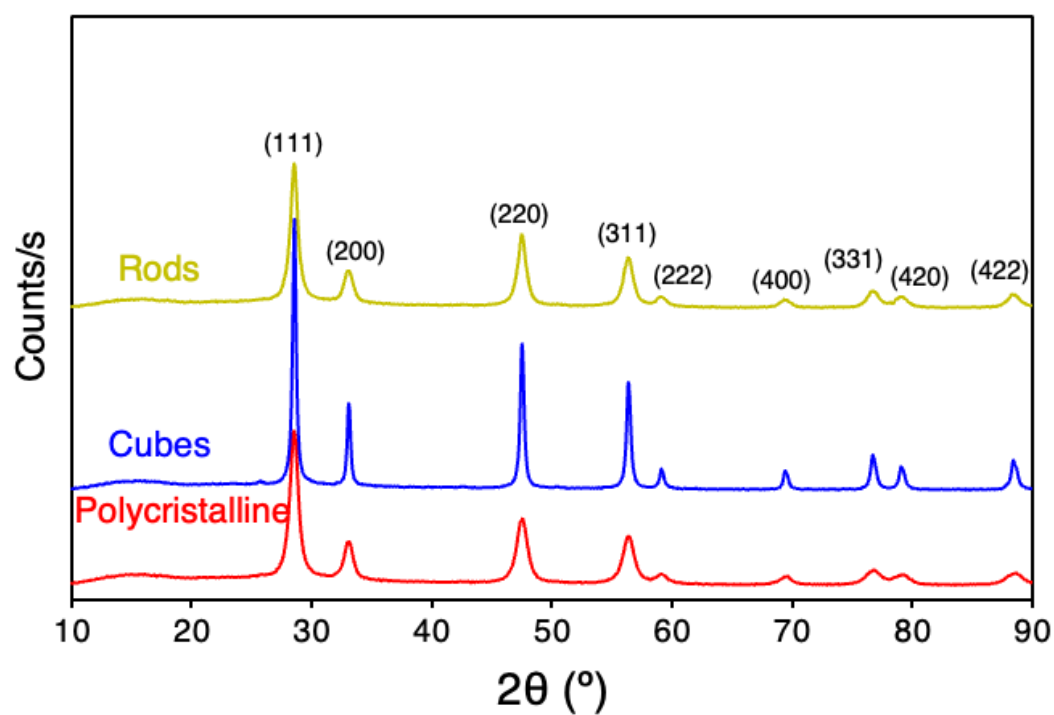

**Figure S1.** X-ray diffractograms of polycrystalline ceria, nano cubes and nano rods. All diffractograms display CeO<sub>2</sub> crystalline features (JCPDS 34–0394).

**X-ray photoelectronic spectroscopy**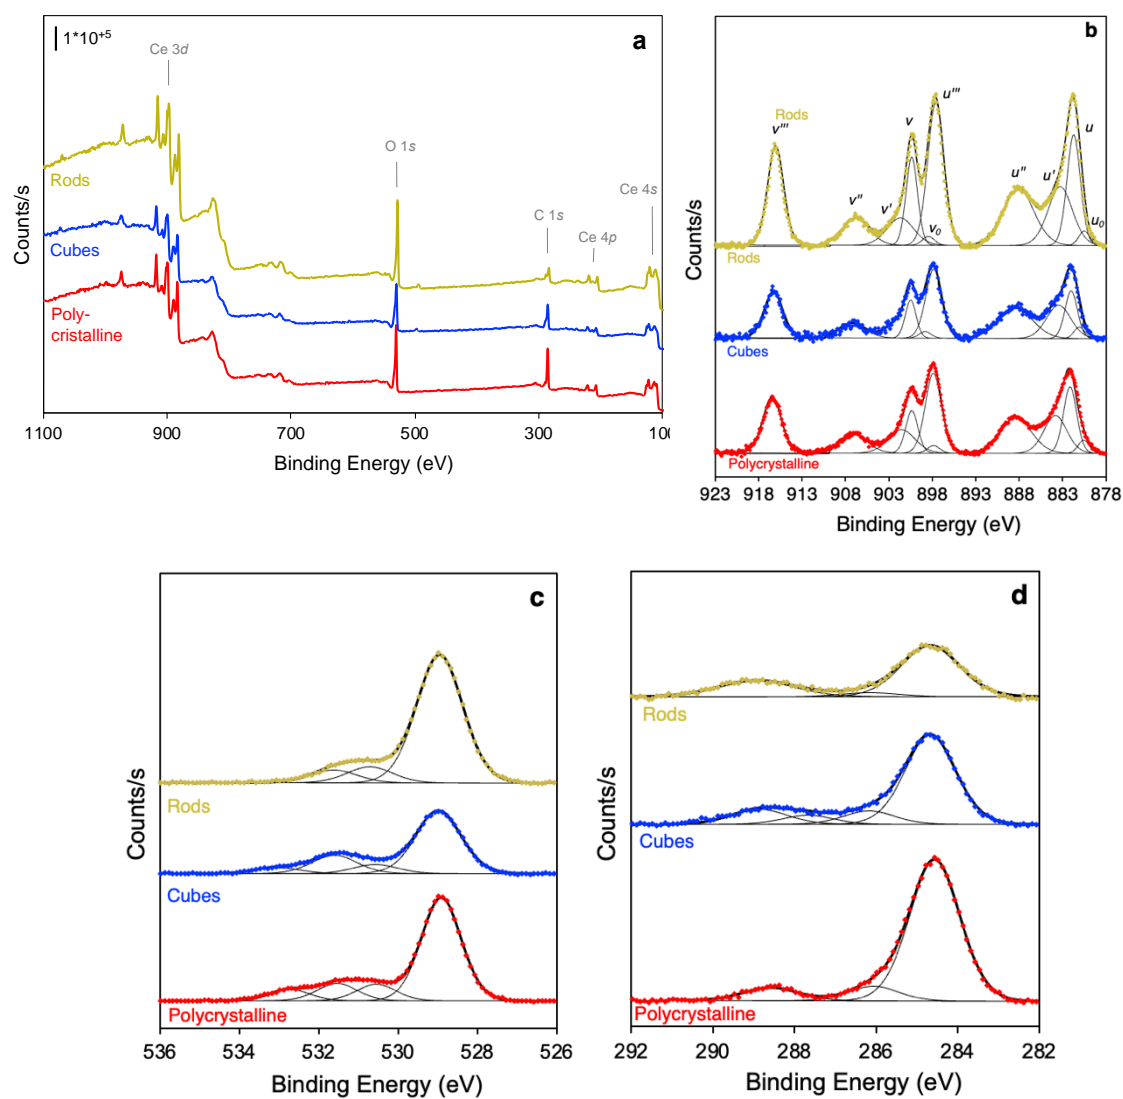

**Figure S2.** XPS characterization: (a) survey spectra; (b) Ce 3d; (c) O 1s and (d) C 1s XPS regions.

## Transmission electron microscopy

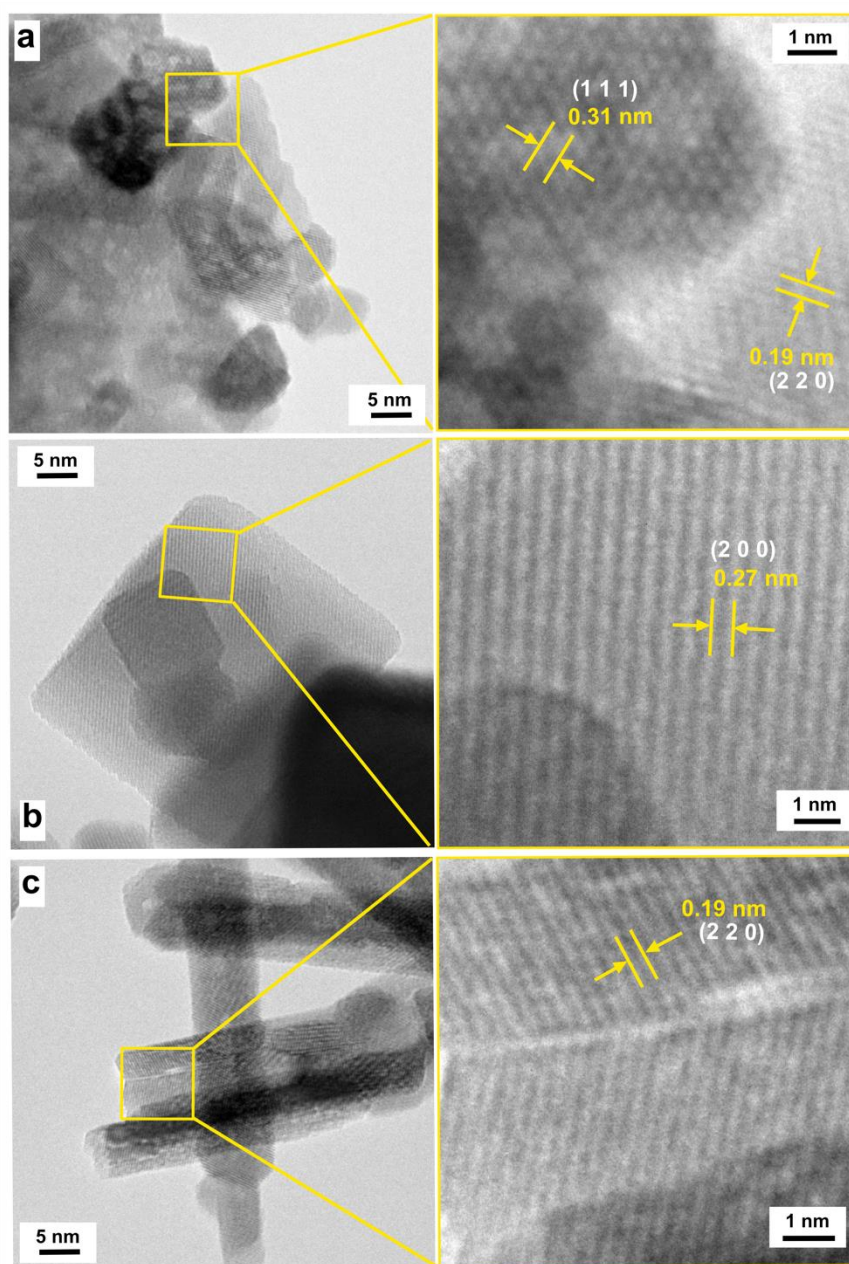

**Figure S3.** TEM images of: (a) polycrystalline ceria; (b) nanocubes; (c) nanorods exhibiting characteristic lattice interplanar fringes.

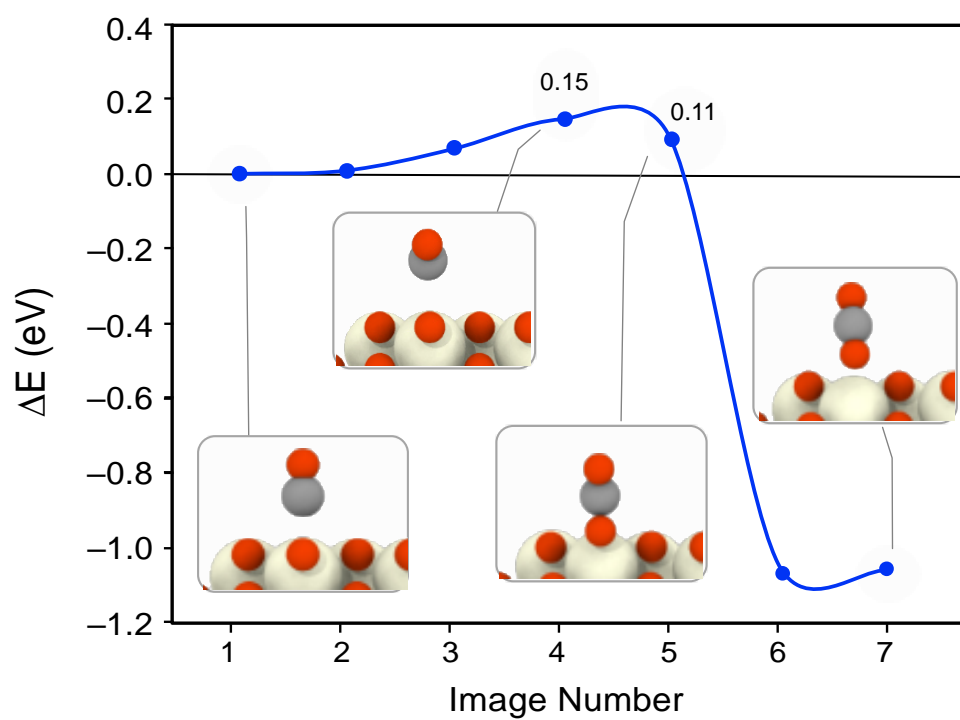

**Figure S4.** CI-NEB calculation of CO oxidation on a clean ceria(111) surface:  $\text{CO}(\text{gas}) + \text{O}^{2-}(\text{lat}) \rightarrow \text{CO}_2^{2-}(\text{ads})$

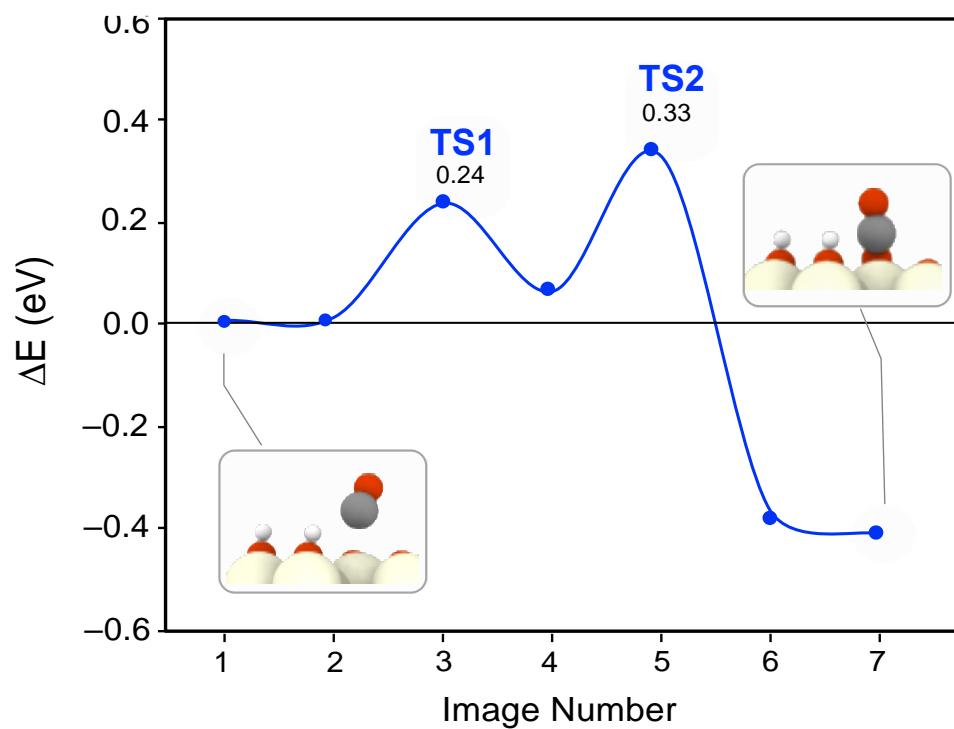

**Figure S5.** CI-NEB calculation of the formation of carboxylate on a 2 OH-covered ceria(111) surface:  $\text{CO}(\text{gas}) + \text{O}^{2-}(\text{lat}) \rightarrow \text{CO}_2^{2-}(\text{ads})$

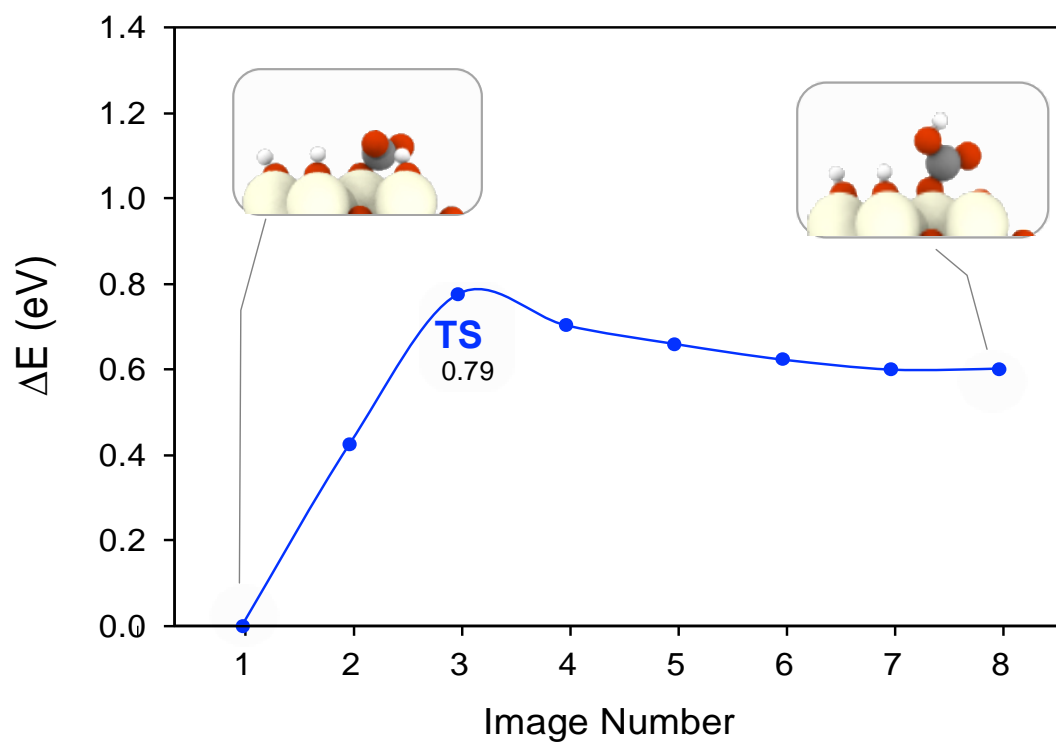

**Figure S6.** CI-NEB calculation of the bicarbonate formation upon proton transfer to carbonate on a 3 OH-covered ceria(111) surface.

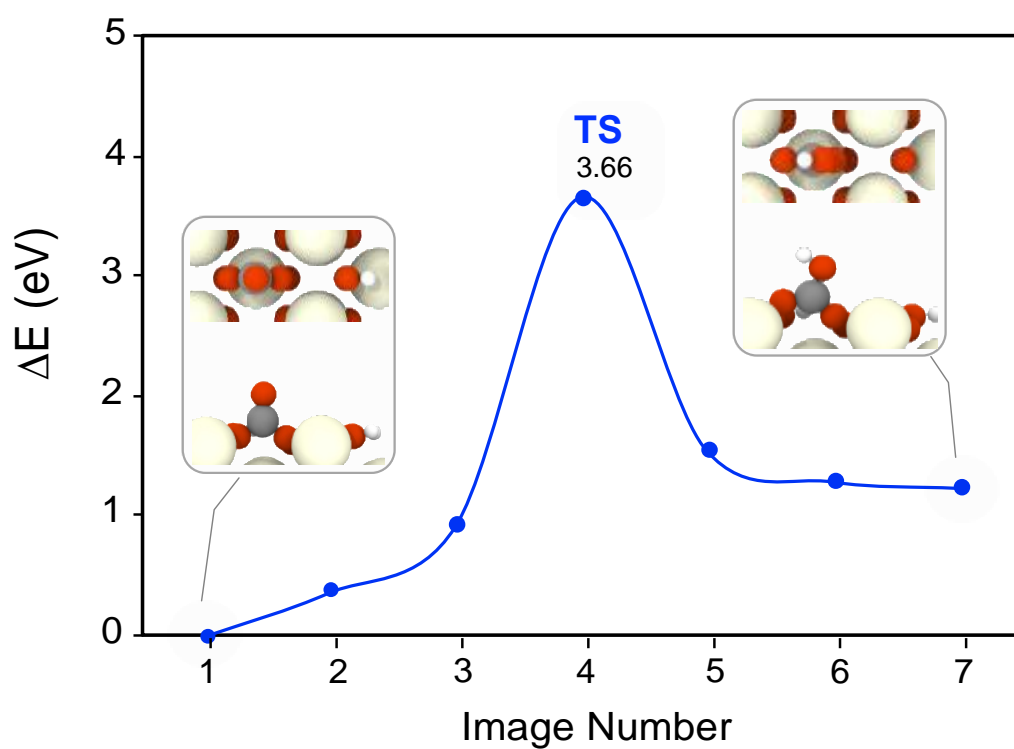

**Figure S7.** CI-NEB calculation of the bicarbonate Type A formation upon proton transfer to carbonate on a 3 OH-covered ceria(110) surface.

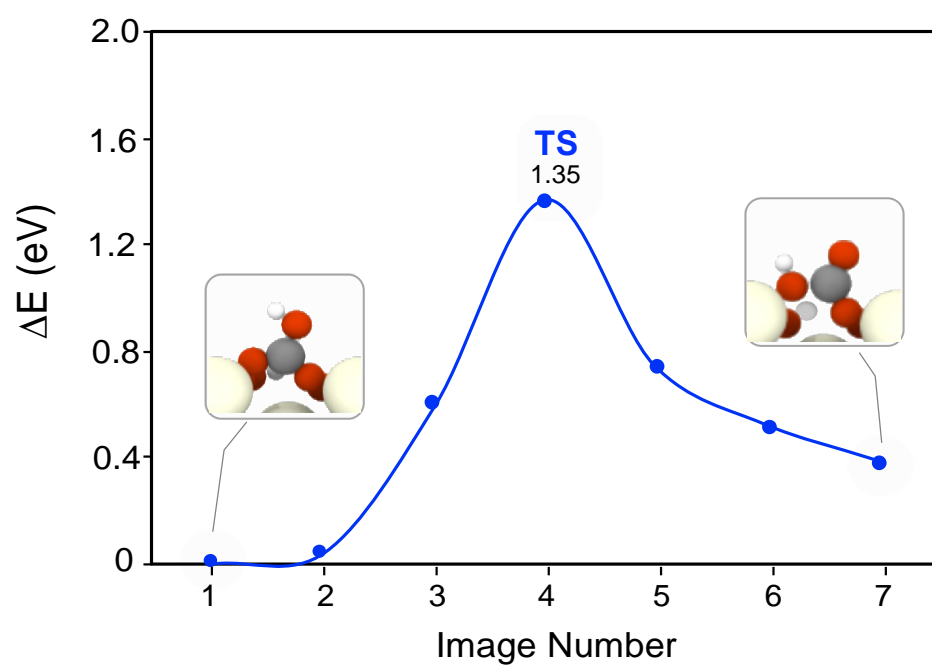

**Figure S8.** CI-NEB calculation of the bicarbonate Type A transformation to bicarbonate Type B on the ceria(110) surface.

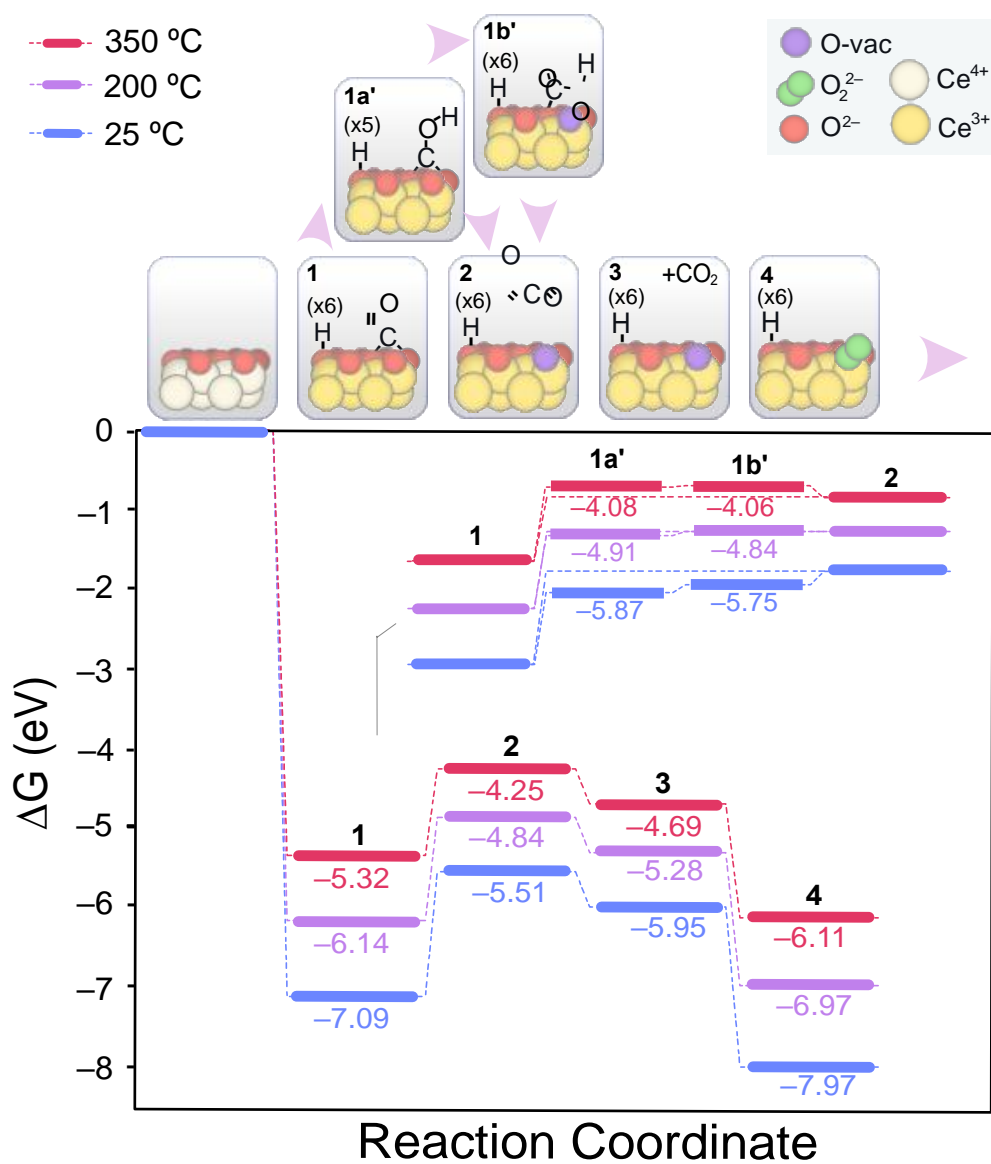

**Figure S9.** CO oxidation on a CeO<sub>2</sub>(110) surface with 6 OH coverage.

**Table S1.** Energies ( $\Delta E$ ) and Gibbs energies at different temperatures ( $\Delta G^T$ ) from DFT calculations on the modeled CeO<sub>2</sub>(111) slab with different adsorbates.

| Adsorbate(s) on CeO <sub>2</sub> (111)    | Binding mode             | $\Delta E$ (eV) | $\Delta G^{25\text{ }^\circ\text{C}}$ (eV) | $\Delta G^{200\text{ }^\circ\text{C}}$ (eV) | $\Delta G^{350\text{ }^\circ\text{C}}$ (eV) |
|-------------------------------------------|--------------------------|-----------------|--------------------------------------------|---------------------------------------------|---------------------------------------------|
| 1 OH                                      | Monocoordinated hydroxyl | −1.25           | −0.83                                      | −0.64                                       | −0.48                                       |
| 2 OH                                      |                          | −2.35           | −1.52                                      | −1.15                                       | −0.81                                       |
| 3 OH                                      |                          | −3.64           | −2.40                                      | −1.84                                       | −1.34                                       |
| 4 OH                                      |                          | −4.83           | −3.18                                      | −2.42                                       | −1.76                                       |
| CO                                        | Top (physisorbed)        | −0.18           | 0.33                                       | 0.60                                        | 0.83                                        |
| CO + 2 OH                                 |                          | −2.52           | −1.39                                      | −1.12                                       | −0.90                                       |
| CO + 4 OH                                 |                          | −4.74           | −3.00                                      | −2.29                                       | −1.69                                       |
| CO <sub>2</sub>                           | Tridentated carbonate    | −0.46           | 0.13                                       | 0.39                                        | 0.60                                        |
| CO <sub>2</sub> + 2 OH                    |                          | −3.07           | −1.86                                      | −1.12                                       | −0.79                                       |
| CO <sub>2</sub> + 3 OH                    |                          | −4.69           | −3.18                                      | −2.59                                       | −2.10                                       |
| CO <sub>2</sub> + V <sup>o</sup>          |                          | −0.51           | 0.09                                       | 0.35                                        | 0.56                                        |
| CO <sub>2</sub> + 2 OH + V <sup>o</sup>   |                          | −3.68           | −2.47                                      | −1.99                                       | −1.60                                       |
| CO <sub>2</sub> H                         | Monodentated bicarbonate | −1.32           | −0.42                                      | −0.06                                       | 0.24                                        |
| CO <sub>2</sub> H + 1 OH                  | Bidentated bicarbonate   | −4.69           | −3.18                                      | −2.59                                       | −2.10                                       |
| CO <sub>2</sub> H + 2 OH                  |                          | −4.08           | −2.58                                      | −2.00                                       | −1.51                                       |
| CO <sub>2</sub> H + 3 OH                  |                          | −5.36           | −3.55                                      | −2.86                                       | −2.27                                       |
| CO <sub>2</sub> H + 1 OH + V <sup>o</sup> | Bidentated bicarbonate   | −3.54           | −2.21                                      | −1.77                                       | −1.41                                       |
| CHO + 1 OH                                | Bidentated formate       | −3.70           | −2.46                                      | −1.97                                       | −1.56                                       |
| CHO + 2 OH                                |                          | −4.87           | −3.33                                      | −2.73                                       | −2.22                                       |
| CHO + 3 OH                                |                          | −6.19           | −4.33                                      | −3.63                                       | −3.02                                       |

**Table S2.** Energies ( $\Delta E$ ) and Gibbs energies at different temperatures ( $\Delta G^T$ ) from DFT calculations on the modeled CeO<sub>2</sub>(110) slab with different adsorbates.

| Adsorbate(s) on CeO <sub>2</sub> (110) | Binding mode                 | $\Delta E$ (eV) | $\Delta G^{25\text{ }^\circ\text{C}}$ (eV) | $\Delta G^{200\text{ }^\circ\text{C}}$ (eV) | $\Delta G^{350\text{ }^\circ\text{C}}$ (eV) |
|----------------------------------------|------------------------------|-----------------|--------------------------------------------|---------------------------------------------|---------------------------------------------|
| 1 OH                                   | Linear (hydroxyl A)          | −1.55           | −1.23                                      | −1.11                                       | −1.00                                       |
| 2 OH                                   |                              | −3.12           | −2.48                                      | −2.24                                       | −2.03                                       |
| 3 OH                                   |                              | −4.64           | −3.68                                      | −3.32                                       | −3.01                                       |
| 4 OH                                   |                              | −6.19           | −4.90                                      | −4.43                                       | −4.01                                       |
| 5 OH                                   | Linear + tilted (hydroxyl B) | −6.91           | −5.30                                      | −4.71                                       | −4.19                                       |
| 6 OH                                   |                              | −7.66           | −5.73                                      | −5.02                                       | −4.40                                       |
| 7 OH                                   |                              | −8.12           | −5.86                                      | −5.04                                       | −4.31                                       |
| 8 OH                                   |                              | −8.82           | −6.25                                      | −5.30                                       | −4.47                                       |
| CO                                     | Bidentate carbonate          | −3.66           | −2.93                                      | −2.68                                       | −2.49                                       |
| CO + 3 OH                              |                              | −7.89           | −5.89                                      | −5.30                                       | −4.81                                       |
| CO + 6 OH                              |                              | −9.75           | −7.09                                      | −6.14                                       | −5.32                                       |
| CHO + 2 OH                             | Bicarbonate bidentate (A)    | −6.65           | −4.93                                      | −4.32                                       | −3.81                                       |
| CHO + 5 OH                             |                              | −7.97           | −5.93                                      | −5.21                                       | −4.59                                       |
| CHO + 2 OH                             | Bicarbonate monodentate (B)  | −6.26           | −4.62                                      | −4.06                                       | −3.60                                       |
| CHO + 5 OH                             |                              | −7.50           | −5.53                                      | −4.86                                       | −4.29                                       |
| CO <sub>2</sub>                        | Monodentate carbonate        | −1.31           | −0.70                                      | −0.44                                       | −0.32                                       |
| CO <sub>2</sub> + 3 OH                 |                              | −6.92           | −5.03                                      | −4.29                                       | −3.76                                       |

**Table S3.** Energies ( $\Delta E$ ) and Gibbs energies at different temperatures ( $\Delta G^T$ ) from DFT calculations on the modeled CeO<sub>2</sub>(100) slab with different adsorbates.

| Adsorbate(s) on CeO <sub>2</sub> (100) | Binding mode                          | $\Delta E$ (eV) | $\Delta G^{25\text{ }^\circ\text{C}}$ (eV) | $\Delta G^{200\text{ }^\circ\text{C}}$ (eV) | $\Delta G^{350\text{ }^\circ\text{C}}$ (eV) |
|----------------------------------------|---------------------------------------|-----------------|--------------------------------------------|---------------------------------------------|---------------------------------------------|
| 1 OH                                   | Monocoordinated hydroxyl <sup>†</sup> | −1.82           | −1.51                                      | −1.40                                       | −1.31                                       |
| 2 OH                                   |                                       | −3.57           | −2.96                                      | −2.74                                       | −2.55                                       |
| 3 OH                                   |                                       | −5.01           | −4.09                                      | −3.77                                       | −3.49                                       |
| 4 OH                                   |                                       | −6.38           | −5.17                                      | −4.73                                       | −4.36                                       |
| CO                                     | Bridge (physisorbed)                  | −0.32           | 0.20                                       | 0.53                                        | 0.83                                        |
| CO + 4 OH                              |                                       | −6.35           | −4.61                                      | −3.85                                       | −3.18                                       |
| CO <sub>2</sub>                        | Polydentate carbonate                 | −1.96           | −1.34                                      | −1.07                                       | −0.86                                       |
| CO <sub>2</sub> + 3 OH                 |                                       | −7.23           | −5.72                                      | −5.13                                       | −4.63                                       |
| CO <sub>2</sub> H                      | Monodentate bicarbonate               | −2.01           | −1.22                                      | −0.88                                       | −0.60                                       |
| CO <sub>2</sub> H + 2 OH               |                                       | −5.28           | −3.80                                      | −3.24                                       | −2.77                                       |
